# Supplementary material
Source: Springer Nature journal article supplement (https://www.springermedizin.de/resource/supplementary/12911_2001_5_MOESM1_ESM.pdf/9525440)
Supplement: MOESM1 [file 9525440]

## Initial search strategy

- 1 exp telemedicine/
- 2 telemedicine.mp.
- 3 telehealth.tw.
- 4 remote consultation\$.mp.
- 5 1 or 2 or 3 or 4
- 6 exp home care services/
- 7 home nursing/
- 8 6 or 7
- 9 exp therapy, computer-assisted/
- 10 exp computers/
- 11 exp computer communication networks/
- 12 exp medical informatics/
- 13 exp telecommunications/
- 14 exp monitoring, physiologic/
- 15 monitor\$.tw.
- 16 blood glucose self-monitoring/
- 17 self-examination/
- 18 self exam\$.tw.
- 19 self monitor\$.tw.
- 20 self test\$.tw.
- 21 14 or 15 or 16 or 17 or 18 or 19 or 20
- 22 tele\$.tw.
- 23 (remote or offsite or distance).tw. tw=abstract, title
- 24 rural population/
- 25 rural health services/
- 26 hospitals, rural/
- 27 rural.tw.
- 28 22 or 23 or 24 or 25 or 26 or 27
- 29 21 and 28
- 30 9 or 10 or 11 or 12 or 13 or 29
- 31 8 and 30
- 32 31 not 5
- 33 limit 32 to english language
- 34 32 not 33
- 35 limit 34 to abstracts
- 36 33 or 35

## Supplemental Search Strategy (to identify more home-based telemedicine articles)

- 1 exp computer communication networks
- 2 patient participation
- 3 exp consumer satisfaction
- 4 delivery of health care
- 5 exp home care services
- 6 exp home nursing
- 7 house calls/ or housecalls.mp
- 8 2 or 3 or 4 or 5 or 6 or 7
- 9 1 and 8
- 10 limit 9 to english language
